# Supplementary material for: Fast estimation of intersystem crossing rate constants of radical pairs
Source: Royal Society of Chemistry journal article supplement (doi:10.1039/d4nj03110e), 2024-01-01
Supplement: d4nj03110e1.pdf [file d4nj03110e1.pdf]

## Supplementary information

### Fast Estimation of Intersystem Crossings Rate Constant of Radical Pairs

Rashid R. Valiev,<sup>\*a</sup> Rinat T. Nasibullin<sup>a</sup>, Severi Juttula<sup>a</sup> and Theo Kurten<sup>a</sup>

<sup>a</sup>University of Helsinki, Department of Chemistry, P.O. Box 55 (A.I. Virtanens plats 1), FIN-00014 University of Helsinki, Finland

Table S1. Root mean squared error (RMSE), Coefficient of determination ( $R^2$ ), total Mean average error (MAE) and MAE for each of the 10 considered dimers for the energies of  $S_1$ ,  $S_2$ ,  $S_3$  and  $S_4$  calculated on **CASSCF** and **CASPT2** level.

|                  | $E(T_1-S_1)$ , $\text{cm}^{-1}$ | $E(T_1-S_2)$ , $\text{cm}^{-1}$ | $E(T_1-S_3)$ , $\text{cm}^{-1}$ | $E(T_1-S_4)$ , $\text{cm}^{-1}$ |
|------------------|---------------------------------|---------------------------------|---------------------------------|---------------------------------|
| MAE(ButO-ButO)   | 2.05                            | 19.13                           | 15.93                           | 34.05                           |
| MAE(MeO-MeO)     | 3.50                            | 34.55                           | 26.96                           | 58.51                           |
| MAE(ButO-MeO)    | 3.19                            | 28.29                           | 15.07                           | 41.55                           |
| MAE(AcO-MeO)     | 1.37                            | 27.87                           | 13.43                           | 39.98                           |
| MAE(HOBuO-MeO)   | 0.91                            | 30.21                           | 11.93                           | 41.16                           |
| MAE(AcO-ButO)    | 1.15                            | 22.05                           | 12.32                           | 33.24                           |
| MAE(ButO-HOBuO)  | 0.79                            | 19.60                           | 9.96                            | 28.95                           |
| MAE(AcO-AcO)     | 0.98                            | 26.34                           | 15.48                           | 41.15                           |
| MAE(AcO-HOBuO)   | 0.51                            | 24.94                           | 12.62                           | 37.27                           |
| MAE(HOBuO-HOBuO) | 0.74                            | 23.44                           | 11.73                           | 34.59                           |
| MAE              | 1.27                            | 25.13                           | 13.37                           | 37.52                           |
| RMSE             | 5.76                            | 31.67                           | 17.04                           | 43.54                           |
| $R^2$            | 1.00                            | 1.00                            | 1.00                            | 1.00                            |

Table S2. Root mean squared error (RMSE), Coefficient of determination ( $R^2$ ), total Mean average error (MAE) and MAE for each of the 10 considered dimers for the SOC between  $T_1$  state and each of the 4 singlet states ( $S_1$ ,  $S_2$ ,  $S_3$  and  $S_4$ ) calculated on **CASPT2** level and with analytical expression on **CASSCF** level.

|                  | $\text{SOC}(T_1-S_1)$ , $\text{cm}^{-1}$ | $\text{SOC}(T_1-S_2)$ , $\text{cm}^{-1}$ | $\text{SOC}(T_1-S_3)$ , $\text{cm}^{-1}$ | $\text{SOC}(T_1-S_4)$ , $\text{cm}^{-1}$ |
|------------------|------------------------------------------|------------------------------------------|------------------------------------------|------------------------------------------|
| MAE(ButO-ButO)   | 1.82                                     | 11.12                                    | 8.76                                     | 1.10                                     |
| MAE(MeO-MeO)     | 1.49                                     | 12.07                                    | 14.01                                    | 1.25                                     |
| MAE(ButO-MeO)    | 1.91                                     | 11.70                                    | 9.31                                     | 1.38                                     |
| MAE(AcO-MeO)     | 0.77                                     | 11.65                                    | 11.00                                    | 0.65                                     |
| MAE(HOBuO-MeO)   | 0.70                                     | 12.24                                    | 10.47                                    | 0.50                                     |
| MAE(AcO-ButO)    | 0.85                                     | 10.56                                    | 8.70                                     | 0.60                                     |
| MAE(ButO-HOBuO)  | 0.58                                     | 11.24                                    | 8.75                                     | 0.49                                     |
| MAE(AcO-AcO)     | 0.76                                     | 10.55                                    | 9.41                                     | 0.59                                     |
| MAE(AcO-HOBuO)   | 0.41                                     | 10.79                                    | 9.55                                     | 0.36                                     |
| MAE(HOBuO-HOBuO) | 0.58                                     | 10.92                                    | 9.56                                     | 0.48                                     |
| MAE              | 0.86                                     | 11.23                                    | 9.79                                     | 0.65                                     |
| RMSE             | 3.58                                     | 12.86                                    | 12.96                                    | 2.20                                     |
| $R^2$            | 0.97                                     | 0.56                                     | 0.55                                     | 0.99                                     |

Table S3. Root mean squared error (RMSE), Coefficient of determination ( $R^2$ ), total Mean average error (MAE) and MAE for each of the 10 considered dimers for the order of magnitude of  $k_{ISC}$  from  $T_1$  state to each of the 4 singlet states ( $S_1$ ,  $S_2$ ,  $S_3$  and  $S_4$ ) calculated on **CASPT2** and **CASSCF** level.

|                  | $k_{ISC}(T_1 \rightarrow S_1)$ ,<br>$s^{-1}$ | $k_{ISC}(T_1 \rightarrow S_2)$ ,<br>$s^{-1}$ | $k_{ISC}(T_1 \rightarrow S_3)$ ,<br>$s^{-1}$ | $k_{ISC}(T_1 \rightarrow S_4)$ ,<br>$s^{-1}$ | $k_{ISC}(T_1 \rightarrow S_n)$ ,<br>$s^{-1}$ |
|------------------|----------------------------------------------|----------------------------------------------|----------------------------------------------|----------------------------------------------|----------------------------------------------|
| MAE(ButO-ButO)   | 0.16                                         | 0.24                                         | 0.24                                         | 0.23                                         | 0.24                                         |
| MAE(MeO-MeO)     | 0.11                                         | 0.22                                         | 0.20                                         | 0.29                                         | 0.22                                         |
| MAE(ButO-MeO)    | 0.15                                         | 0.22                                         | 0.22                                         | 0.20                                         | 0.22                                         |
| MAE(AcO-MeO)     | 0.14                                         | 0.22                                         | 0.21                                         | 0.20                                         | 0.22                                         |
| MAE(HOBuO-MeO)   | 0.11                                         | 0.22                                         | 0.19                                         | 0.18                                         | 0.23                                         |
| MAE(AcO-ButO)    | 0.16                                         | 0.24                                         | 0.23                                         | 0.21                                         | 0.24                                         |
| MAE(ButO-HOBuO)  | 0.11                                         | 0.24                                         | 0.21                                         | 0.13                                         | 0.24                                         |
| MAE(AcO-AcO)     | 0.17                                         | 0.25                                         | 0.22                                         | 0.26                                         | 0.25                                         |
| MAE(AcO-HOBuO)   | 0.12                                         | 0.24                                         | 0.22                                         | 0.20                                         | 0.25                                         |
| MAE(HOBuO-HOBuO) | 0.12                                         | 0.24                                         | 0.21                                         | 0.17                                         | 0.24                                         |
| MAE              | 0.13                                         | 0.23                                         | 0.21                                         | 0.19                                         | 0.24                                         |
| RMSE             | 0.19                                         | 0.25                                         | 0.23                                         | 0.25                                         | 0.25                                         |
| $R^2$            | 1.00                                         | 0.98                                         | 0.99                                         | 0.99                                         | 0.98                                         |

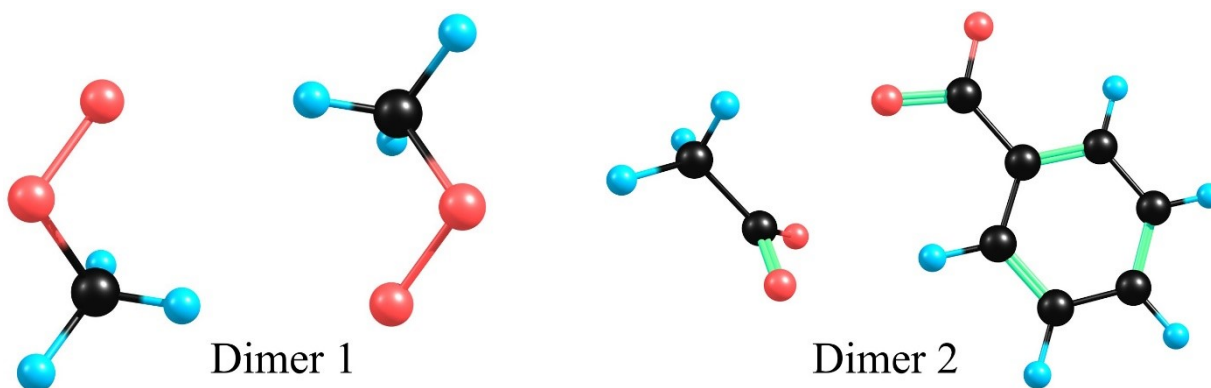

Figure S1. Structures of dimers **Dimer 1** and **Dimer 2** for test calculation

Table S4. Energy gap ( $E$ ), spin-orbit coupling matrix element (SOC) and intersystem crossing rate constant ( $k_{ISC}$ ) for transitions  $T_1 \rightarrow S_n$ , ( $n=1-4$ ) calculated on **CASSCF** and **CASPT2** levels of theory for **Dimer 1** and **Dimer 2**

|                                           | Dimer 1, CASSCF       | Dimer 1, CASPT2       | Dimer 2, CASSCF       | Dimer 2, CASPT2       |
|-------------------------------------------|-----------------------|-----------------------|-----------------------|-----------------------|
| $E(T_1-S_1)$ , $cm^{-1}$                  | -16.56                | -39.46                | 0.28                  | -6.51                 |
| $E(T_1-S_2)$ , $cm^{-1}$                  | 4168.52               | 7427.71               | 4831.73               | 4449.06               |
| $E(T_1-S_3)$ , $cm^{-1}$                  | 4187.37               | 7437.48               | 5479.87               | 4832.53               |
| $E(T_1-S_4)$ , $cm^{-1}$                  | 8423.96               | 14900.44              | 10345.47              | 9296.20               |
| $SOC(T_1-S_1)$ , $cm^{-1}$                | 0.76                  | 0.77                  | 0.01                  | 0.01                  |
| $SOC(T_1-S_2)$ , $cm^{-1}$                | 56.51                 | 39.70                 | 110.52                | 90.81                 |
| $SOC(T_1-S_3)$ , $cm^{-1}$                | 167.25                | 160.38                | 11.48                 | 89.78                 |
| $SOC(T_1-S_4)$ , $cm^{-1}$                | 0.30                  | 0.69                  | 0.07                  | 0.08                  |
| $k_{ISC}(T_1 \rightarrow S_1)$ , $s^{-1}$ | $6.78 \cdot 10^8$     | $6.90 \cdot 10^8$     | $7.81 \cdot 10^4$     | $1.15 \cdot 10^5$     |
| $k_{ISC}(T_1 \rightarrow S_2)$ , $s^{-1}$ | $3.74 \cdot 10^1$     | $5.22 \cdot 10^{-9}$  | $1.80 \cdot 10^0$     | $1.53 \cdot 10^1$     |
| $k_{ISC}(T_1 \rightarrow S_3)$ , $s^{-1}$ | $3.00 \cdot 10^2$     | $7.96 \cdot 10^{-8}$  | $2.57 \cdot 10^{-4}$  | $7.32 \cdot 10^{-2}$  |
| $k_{ISC}(T_1 \rightarrow S_4)$ , $s^{-1}$ | $2.93 \cdot 10^{-16}$ | $8.44 \cdot 10^{-36}$ | $2.01 \cdot 10^{-23}$ | $4.51 \cdot 10^{-20}$ |
| $k_{ISC}(T_1 \rightarrow S_n)$ , $s^{-1}$ | $6.78 \cdot 10^8$     | $6.90 \cdot 10^8$     | $7.81 \cdot 10^4$     | $1.15 \cdot 10^5$     |
